# Supplementary material for: Phylogenomic Analysis of Dichrocephala benthamii and Comparative Analysis within Tribe Astereae (Asteraceae)
Source: PubMed Central journal article supplement (PMC11495966; doi:10.1590/1678-4685-gmb-2023-0340), 2024-10-21
Supplement: 1415-4757-GMB-47-4-e20230340-s1.pdf [file 1415-4757-GMB-47-4-e20230340-s1.pdf]

**Supplementary Material to “Phylogenomic Analysis of *Dichrocephala benthamii* and Comparative Analysis within Tribe Astereae (Asteraceae)”**

**Table S1** - information on the 28 species used in the study.

| Species name                                                    | GenBank accession | Tribe       | Subtribe        |
|-----------------------------------------------------------------|-------------------|-------------|-----------------|
| <i>Ajania pacifica</i> (Nakai) K.Bremer & Humphries             | NC_050690         | Anthemideae | Artemisiinae    |
| <i>Achillea millefolium</i> L.                                  | ON320384.1        | Anthemideae | Matricariinae   |
| <i>Aster ageratoides</i> (Nakai) K.Bremer & Humphries           | NC_058273.1       | Astereae    | Asterinae       |
| <i>Aster pekinensis</i> (Homce) F.H.Chen                        | MW255593.1        | Astereae    | Asterinae       |
| <i>Aster tataricus</i> L.f.                                     | NC_042913.1       | Astereae    | Asterinae       |
| <i>Baccharis tricuneata</i> (L.f.) Pers                         | KX063888.1        | Astereae    | Baccharidinae   |
| <i>Diplostephium alveolatum</i> Cuatrec.                        | NC_034847.1       | Astereae    | Baccharidinae   |
| <i>Diplostephium antioquense</i> Cuatrec.                       | NC_034876.1       | Astereae    | Baccharidinae   |
| <i>Heteropappus gouldii</i> (C. E. C. Fisch.) Grierson          | NC_061598.1       | Astereae    | Baccharidinae   |
| <i>Heteroplexis sericophylla</i> Y. L. Chen                     | MK942054.1        | Astereae    | Baccharidinae   |
| <i>Linochilus alveolatus</i> (Cuatrec.) Saldivia & O.M.Vargas   | KX063856.1        | Astereae    | Baccharidinae   |
| <i>Linochilus antioquensis</i> (Cuatrec.) Saldivia & O.M.Vargas | KX063898.1        | Astereae    | Baccharidinae   |
| <i>Pityopsis falcata</i> (Pursh) Nutt.                          | KY045817.1        | Astereae    | Chrysopsidinae  |
| <i>Erigeron annuus</i> (L.) Pers.                               | MZ361990.1        | Astereae    | Conyzinae       |
| <i>Erigeron breviscapus</i> (Vaniot) Hand.-Mazz.                | NC_043882.1       | Astereae    | Conyzinae       |
| <i>Erigeron canadensis</i> Ten.                                 | MT806101.1        | Astereae    | Conyzinae       |
| <i>Dichrocephala benthamii</i> C.B.Clarke                       | ON751565          | Astereae    | Grangeinae      |
| <i>Aztecaster matudae</i> (Rzed.) G.L.Nesom                     | KX063935.1        | Astereae    | Hinterhuberinae |
| <i>Floscaldasia hypsophila</i> Cuatrec.                         | NC_034888.1       | Astereae    | Hinterhuberinae |
| <i>Hinterhubera ericoides</i> Wedd.                             | NC_034884.1       | Astereae    | Hinterhuberinae |
| <i>Laestadia muscicola</i> Wedd.                                | NC_034858.1       | Astereae    | Hinterhuberinae |
| <i>Llerasia caucana</i> (S.F.Blake) Cuatrec.                    | NC_034821.1       | Astereae    | Hinterhuberinae |

| Species name                                             | GenBank accession | Tribe    | Subtribe        |
|----------------------------------------------------------|-------------------|----------|-----------------|
| <i>Westoniella kohkemperi</i> Cuatrec.                   | KX063921.1        | Astereae | Hinterhuberinae |
| <i>Blakiella bartsiifolia</i> (S.F.Blake) Cuatrec.       | NC_034866.1       | Astereae | Podocominae     |
| <i>Laennecia sophiifolia</i> (Kunth) G.L.Nesom           | NC_034877.1       | Astereae | Podocominae     |
| <i>Solidago decurrens</i> Lour.                          | NC_053705.1       | Astereae | Solidagininae   |
| <i>Symphotrichum subulatum</i> (Michx.)<br>G.L.Nesom     | NC_050667.1       | Astereae | Symphotrichinae |
| <i>Exostigma notobellidiastrum</i> (Griseb.)<br>G.Sancho | NC034864.1        | Astereae | unplaced        |
| <i>Nannoglottis ravida</i> (C.Winkl.) Y.L.Chen           | NC_053322.1       | Astereae | unplaced        |
