# Supplementary material for: Phylogenomic Analysis of Dichrocephala benthamii and Comparative Analysis within Tribe Astereae (Asteraceae)
Source: PubMed Central journal article supplement (PMC11495966; doi:10.1590/1678-4685-gmb-2023-0340), 2024-10-21
Supplement: 1415-4757-GMB-47-4-e20230340-s2.pdf [file 1415-4757-GMB-47-4-e20230340-s2.pdf]

## Supplementary Material to “Phylogenomic Analysis of *Dichrocephala benthamii* and Comparative Analysis within Tribe Astereae (Asteraceae)”

**Table S2** - List of genes found in *D. benthamii*.

| Category of Genes | Group of Genes                      | Name of Genes                                                                                           | Number of genes |
|-------------------|-------------------------------------|---------------------------------------------------------------------------------------------------------|-----------------|
|                   | Subunits of photosystem I           | <i>psaA, psaB, psaC, psaI, psaJ</i>                                                                     | 5               |
|                   | Subunits of photosystem II          | <i>psbA, psbB, psbC, psbD, psbE, psbF, psbH, psbI, psbJ, psbK, psbL, psbM, psbN, psbT, psbZ</i>         | 15              |
| Photosynthesis    | Subunits of NADH dehydrogenase      | <i>ndhA*, ndhB*(x2), ndhC, ndhD, ndhE, ndhF, ndhG, ndhH, ndhI, ndhJ, ndhK</i>                           | 12              |
|                   | Subunits of cytochrome b/f complex  | <i>petA, petB*, petD*, petG, petL, petN</i>                                                             | 6               |
|                   | Subunits of ATP synthase            | <i>atpA, atpB, atpE, atpF*, atpH, atpI</i>                                                              | 6               |
|                   | Large subunit of rubisco            | <i>rbcL</i>                                                                                             | 1               |
|                   | Proteins of large ribosomal subunit | <i>rpl14, rpl16, rpl2*(x2), rpl20, rpl22, rpl23(x2), rpl32, rpl33, rpl36</i>                            | 11              |
| Self-replication  | Proteins of small ribosomal subunit | <i>#rps19, rps11, rps12**(x2), rps14, rps15, rps16*, rps18, rps19, rps2, rps3, rps4, rps7(x2), rps8</i> | 15              |
|                   | Subunits of RNA polymerase          | <i>rpoA, rpoB, rpoC1*, rpoC2</i>                                                                        | 4               |

| Category of Genes         | Group of Genes                         | Name of Genes                                                                                                                                                                                                                                                                                                                                      | Number of genes |
|---------------------------|----------------------------------------|----------------------------------------------------------------------------------------------------------------------------------------------------------------------------------------------------------------------------------------------------------------------------------------------------------------------------------------------------|-----------------|
|                           | Ribosomal RNAs                         | <i>rrn16(x2), rrn23(x2), rrn4.5(x2), rrn5(x2)</i>                                                                                                                                                                                                                                                                                                  | 8               |
|                           | Transfer RNAs                          | <i>trnA-UGC*(2), trnC-GCA, trnD-GUC, trnE-UUC, trnF-GAA, trnG*, trnG-UCC, trnH-GUG, trnI-CAU(2), trnI-GAU*(2), trnK-UUU*, trnL-CAA(2), trnL-UAA, trnL-UAA*, trnL-UAG, trnM-CAU, trnN-GUU(2), trnP-UGG, trnQ-UUG, trnR-ACG(2), trnR-UCU, trnS-GCU, trnS-GGA, trnS-UGA, trnT-GGU, trnT-UGU, trnV-GAC(2), trnV-UAC*, trnW-CCA, trnY-GUA, trnM-CAU</i> | 38              |
|                           | Maturase                               | <i>matK</i>                                                                                                                                                                                                                                                                                                                                        | 1               |
|                           | Protease                               | <i>clpP**</i>                                                                                                                                                                                                                                                                                                                                      | 1               |
| Other genes               | Envelope membrane protein              | <i>cemA</i>                                                                                                                                                                                                                                                                                                                                        | 1               |
|                           | Acetyl-CoA carboxylase                 | <i>accD</i>                                                                                                                                                                                                                                                                                                                                        | 1               |
|                           | c-type cytochrome synthesis gene       | <i>ccsA</i>                                                                                                                                                                                                                                                                                                                                        | 1               |
|                           | Translation initiation factor          | <i>infA</i>                                                                                                                                                                                                                                                                                                                                        | 1               |
| Genes of unknown function | Conserved hypothetical chloroplast ORF | <i>#ycf1, ycf1, ycf15(2), ycf2(2), ycf3**, ycf4</i>                                                                                                                                                                                                                                                                                                | 8               |

Notes: \*Gene contains one intron. \*\*Gene contains two introns. #: Pseudo gene. (×2) indicates the number of the repeat unit is 2.
