# Supplementary material for: Phylogenomic Analysis of Dichrocephala benthamii and Comparative Analysis within Tribe Astereae (Asteraceae)
Source: PubMed Central journal article supplement (PMC11495966; doi:10.1590/1678-4685-gmb-2023-0340), 2024-10-21
Supplement: 1415-4757-GMB-47-4-e20230340-s3.pdf [file 1415-4757-GMB-47-4-e20230340-s3.pdf]

## Supplementary Material to “Phylogenomic Analysis of *Dichrocephala benthamii* and Comparative Analysis within Tribe Astereae (Asteraceae)”

**Table S3** - SSR in the cp genome of *D. benthamii*.

| Repeat type (number) | Repeat Sequence | Number of repetitions |   |    |   |   |   |   |    |    |    |    |    |    |    | total |
|----------------------|-----------------|-----------------------|---|----|---|---|---|---|----|----|----|----|----|----|----|-------|
|                      |                 | 3                     | 4 | 5  | 6 | 7 | 8 | 9 | 10 | 11 | 12 | 13 | 14 | 15 | 16 |       |
| Mononucleotides (36) | A/T             | -                     | - | -  | - | - | - | - | 19 | 6  | 5  | 3  |    | 1  | 2  | 36    |
| Dinucleotides (19)   | AT/AT           | -                     | - | 13 | 5 | 1 |   |   |    |    |    |    |    |    |    | 19    |
| trinucleotide (12)   | AAG/CTT         | -                     | 1 | 1  |   |   |   |   |    |    |    |    |    |    |    | 2     |
|                      | AAT/AAT         | 8                     | 2 |    |   |   |   |   |    |    |    |    |    |    |    | 10    |
| Tetranucleotide (16) | AAAT/ATTT       | 12                    |   |    |   |   |   |   |    |    |    |    |    |    |    | 12    |
|                      | AATC/ATTG       | 1                     |   |    |   |   |   |   |    |    |    |    |    |    |    | 1     |
|                      | AATT/AATT       | 2                     |   |    |   |   |   |   |    |    |    |    |    |    |    | 2     |
|                      | AGAT/ATCT       | 1                     |   |    |   |   |   |   |    |    |    |    |    |    |    | 1     |
| Pentanucleotide (2)  | AAACT/AGTTT     | 1                     |   |    |   |   |   |   |    |    |    |    |    |    |    | 1     |
|                      | AATAT/ATATT     | 1                     |   |    |   |   |   |   |    |    |    |    |    |    |    | 1     |
| Hexanucleotide (2)   | AATCCT/AGGATT   | 2                     |   |    |   |   |   |   |    |    |    |    |    |    |    | 2     |
