# Supplementary material for: Phylogenomic Analysis of Dichrocephala benthamii and Comparative Analysis within Tribe Astereae (Asteraceae)
Source: PubMed Central journal article supplement (PMC11495966; doi:10.1590/1678-4685-gmb-2023-0340), 2024-10-21
Supplement: 1415-4757-GMB-47-4-e20230340-s4.pdf [file 1415-4757-GMB-47-4-e20230340-s4.pdf]

**Supplementary Material to “Phylogenomic Analysis of *Dichrocephala benthamii* and Comparative Analysis within Tribe Astereae (Asteraceae)”**

**Table S4** - Codon usage in the chloroplast genomes of *D. benthamii*.

| Amino acid | Symbol | Codon | Count | RSCU   | Amino acid | Symbol | Codon | Count | RSCU   |
|------------|--------|-------|-------|--------|------------|--------|-------|-------|--------|
| *          | Ter    | UAA   | 48    | 1.7778 | M          | Met    | AUU   | 1     | 0.0128 |
| *          | Ter    | UAG   | 19    | 0.7037 | M          | Met    | CUG   | 0     | 0      |
| *          | Ter    | UGA   | 14    | 0.5185 | M          | Met    | GUG   | 0     | 0      |
| A          | Ala    | GCA   | 359   | 1.1089 | M          | Met    | UUG   | 0     | 0      |
| A          | Ala    | GCC   | 211   | 0.6517 | N          | Asn    | AAC   | 239   | 0.443  |
| A          | Ala    | GCG   | 147   | 0.4541 | N          | Asn    | AAU   | 840   | 1.557  |
| A          | Ala    | GCU   | 578   | 1.7853 | P          | Pro    | CCA   | 275   | 1.1329 |
| C          | Cys    | UGC   | 73    | 0.5703 | P          | Pro    | CCC   | 184   | 0.758  |
| C          | Cys    | UGU   | 183   | 1.4297 | P          | Pro    | CCG   | 142   | 0.585  |
| D          | Asp    | GAC   | 180   | 0.3987 | P          | Pro    | CCU   | 370   | 1.5242 |
| D          | Asp    | GAU   | 723   | 1.6013 | Q          | Gln    | CAA   | 648   | 1.5521 |
| E          | Glu    | GAA   | 881   | 1.5073 | Q          | Gln    | CAG   | 187   | 0.4479 |
| E          | Glu    | GAG   | 288   | 0.4927 | R          | Arg    | AGA   | 422   | 1.8522 |
| F          | Phe    | UUC   | 421   | 0.6502 | R          | Arg    | AGG   | 140   | 0.6145 |
| F          | Phe    | UUU   | 874   | 1.3498 | R          | Arg    | CGA   | 303   | 1.3299 |
| G          | Gly    | GGA   | 599   | 1.5041 | R          | Arg    | CGC   | 89    | 0.3906 |
| G          | Gly    | GGC   | 188   | 0.4721 | R          | Arg    | CGG   | 98    | 0.4301 |
| G          | Gly    | GGG   | 286   | 0.7181 | R          | Arg    | CGU   | 315   | 1.3826 |
| G          | Gly    | GGU   | 520   | 1.3057 | S          | Ser    | AGC   | 98    | 0.3488 |
| H          | His    | CAC   | 135   | 0.5153 | S          | Ser    | AGU   | 354   | 1.2598 |
| H          | His    | CAU   | 389   | 1.4847 | S          | Ser    | UCA   | 342   | 1.2171 |
| I          | Ile    | AUA   | 607   | 0.9435 | S          | Ser    | UCC   | 246   | 0.8754 |
| I          | Ile    | AUC   | 358   | 0.5565 | S          | Ser    | UCG   | 135   | 0.4804 |
| I          | Ile    | AUU   | 965   | 1.5    | S          | Ser    | UCU   | 511   | 1.8185 |

| Amino acid | Symbol | Codon | Count | RSCU   | Amino acid | Symbol | Codon | Count | RSCU   |
|------------|--------|-------|-------|--------|------------|--------|-------|-------|--------|
| K          | Lys    | AAA   | 895   | 1.4992 | T          | Thr    | ACA   | 356   | 1.2255 |
| K          | Lys    | AAG   | 299   | 0.5008 | T          | Thr    | ACC   | 221   | 0.7608 |
| L          | Leu    | CUA   | 316   | 0.778  | T          | Thr    | ACG   | 115   | 0.3959 |
| L          | Leu    | CUC   | 155   | 0.3816 | T          | Thr    | ACU   | 470   | 1.6179 |
| L          | Leu    | CUG   | 150   | 0.3693 | V          | Val    | GUA   | 479   | 1.5218 |
| L          | Leu    | CUU   | 524   | 1.2901 | V          | Val    | GUC   | 154   | 0.4893 |
| L          | Leu    | UUA   | 793   | 1.9524 | V          | Val    | GUG   | 166   | 0.5274 |
| L          | Leu    | UUG   | 499   | 1.2286 | V          | Val    | GUU   | 460   | 1.4615 |
| M          | Met    | AUA   | 0     | 0      | W          | Trp    | UGG   | 403   | 1      |
| M          | Met    | AUC   | 1     | 0.0128 | Y          | Tyr    | UAC   | 152   | 0.3543 |
| M          | Met    | AUG   | 547   | 6.9745 | Y          | Tyr    | UAU   | 706   | 1.6457 |
