# Supplementary material for: Phylogenomic Analysis of Dichrocephala benthamii and Comparative Analysis within Tribe Astereae (Asteraceae)
Source: PubMed Central journal article supplement (PMC11495966; doi:10.1590/1678-4685-gmb-2023-0340), 2024-10-21
Supplement: 1415-4757-GMB-47-4-e20230340-s5.pdf [file 1415-4757-GMB-47-4-e20230340-s5.pdf]

**Supplementary Material to “Phylogenomic Analysis of *Dichrocephala benthamii* and Comparative Analysis within Tribe Astereae (Asteraceae)”**

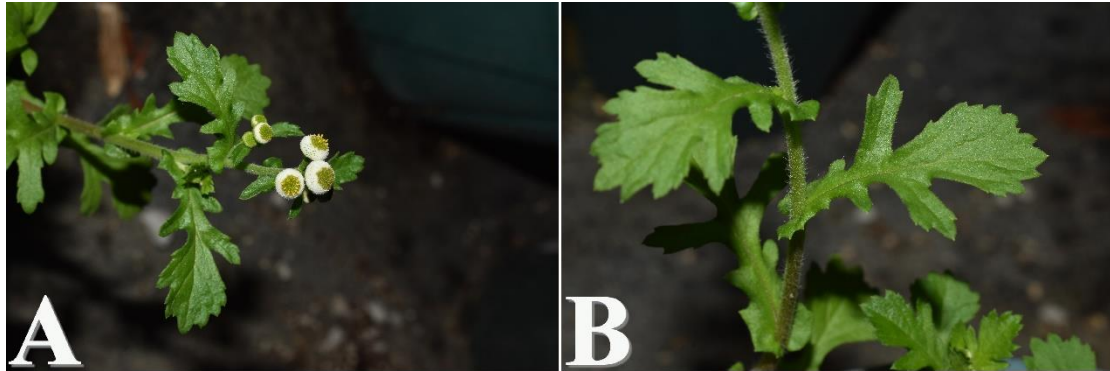

**Figure S1** - The photos of *D. benthamii* were taken by Xudong, Ma without any copyright issues. Panel A shows its flowers and Panel B shows its leaves. The plant's coordinate is 28.639801 N, 102.507680 E. It's an annual herb 6.5-35 cm tall. Leaves sessile, blade ovate. Capitula globose, 3-5 mm in diam, bloom in year-round. Achenes straw-colored, obovoid. This plant thrives in grasslands in valleys, riverbanks, fields, wastelands, roadsides at an altitude of 700-3200 metres.
