# Supplementary material for: Phylogenomic Analysis of Dichrocephala benthamii and Comparative Analysis within Tribe Astereae (Asteraceae)
Source: PubMed Central journal article supplement (PMC11495966; doi:10.1590/1678-4685-gmb-2023-0340), 2024-10-21
Supplement: 1415-4757-GMB-47-4-e20230340-s7.pdf [file 1415-4757-GMB-47-4-e20230340-s7.pdf]

## Supplementary Material to “Phylogenomic Analysis of *Dichrocephala benthamii* and Comparative Analysis within Tribe Astereae (Asteraceae)”

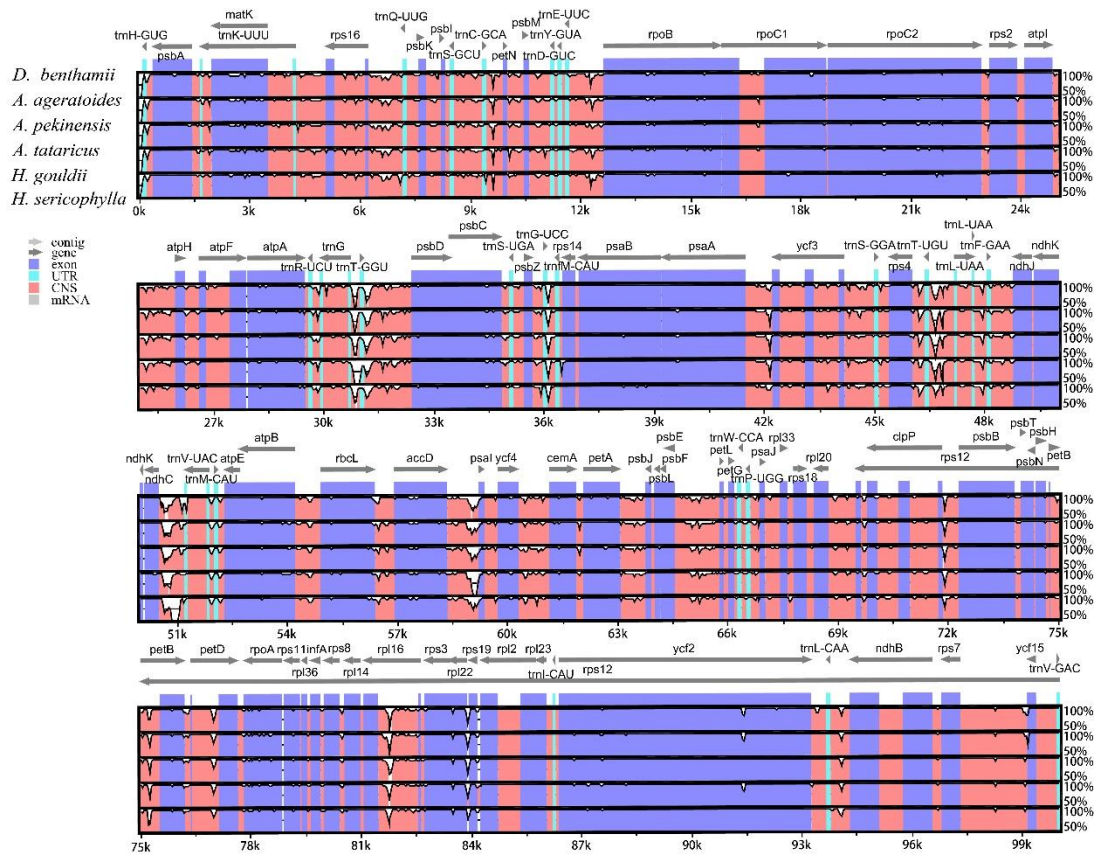

**Figure S3** - The cp genomes of 6 species of Astereae were compared using the mVista program with *D. benthamii* as the reference. The arrow indicates the position and orientation of the gene. The Y -axis represents the percentage of identity among genome sequences (50%–100%).
