# Supplementary material for: Phylogenomic Analysis of Dichrocephala benthamii and Comparative Analysis within Tribe Astereae (Asteraceae)
Source: PubMed Central journal article supplement (PMC11495966; doi:10.1590/1678-4685-gmb-2023-0340), 2024-10-21
Supplement: 1415-4757-GMB-47-4-e20230340-s8.pdf [file 1415-4757-GMB-47-4-e20230340-s8.pdf]

**Supplementary Material to “Phylogenomic Analysis of *Dichrocephala benthamii* and Comparative Analysis within Tribe Astereae (Asteraceae)”**

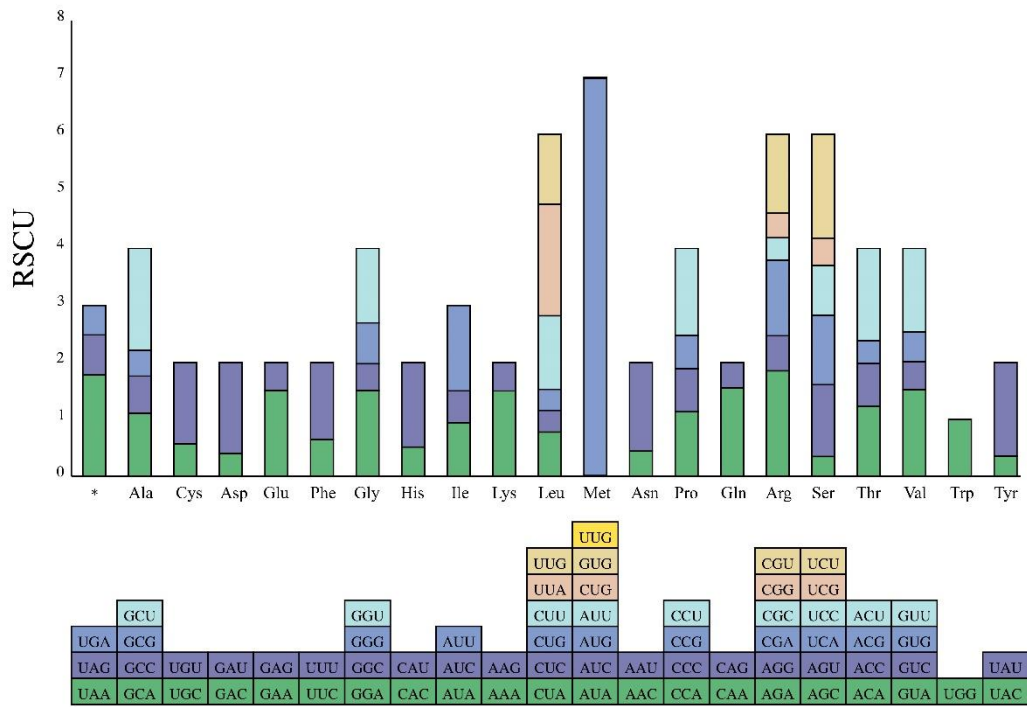

**Figure S4** - Codon content of 20 amino acid and stop codons in all protein-coding genes of the CP genome of *D. benthamii*.
